1 **Incidental reinstatement of faces and scenes in medial temporal lobe**  
2 **subregions during word recognition**

3 **Authors:** Heidrun Schultz<sup>1,2\*</sup>, Tobias Sommer<sup>1</sup>, Jan Peters<sup>1,3</sup>

4 <sup>1</sup>Department of Systems Neuroscience, University Medical Center Hamburg-Eppendorf,  
5 Hamburg, Germany

6 <sup>2</sup>Max Planck Institute for Human Cognitive and Brain Sciences, Leipzig, Germany

7 <sup>3</sup>Department of Psychology, Biological Psychology, University of Cologne, Cologne,  
8 Germany

9

10 **\*Corresponding author:** Heidrun Schultz, Max Planck Institute for Human Cognitive and  
11 Brain Sciences, Stephanstr. 1A, 04103 Leipzig, Germany. Email address:  
12 [heidrun.schultz@cbs.mpg.de](mailto:heidrun.schultz@cbs.mpg.de)

13

14 **Conflict of interest:** The authors declare no conflict of interest.

15

16 **Funding:** This work was supported by a grant from the Deutsche Forschungsgemeinschaft  
17 (PE-1627/2-1).

## 18 Abstract

19 During associative retrieval, the brain reinstates neural representations that were present  
20 during encoding. The human medial temporal lobe (MTL) with its subregions hippocampus  
21 (HC), perirhinal cortex (PRC), and parahippocampal cortex (PHC) plays a central role in neural  
22 reinstatement. Previous studies have given compelling evidence for reinstatement in the MTL  
23 during explicitly instructed associative retrieval. High-confident recognition may be similarly  
24 accompanied by recollection of associated information from the encoding context. It is unclear,  
25 however, whether high-confident recognition memory elicits reinstatement in the MTL even in  
26 the absence of an explicit instruction to retrieve associated information. Here, we addressed  
27 this open question using high-resolution fMRI. Twenty-eight male and female human  
28 volunteers engaged in a recognition memory task for words that they had previously encoded  
29 together with faces and scenes. Using complementary uni- and multivariate approaches, we  
30 show that MTL subregions including the PRC, PHC, and HC differentially reinstate category-  
31 specific representations during high-confident word recognition, even though no explicit  
32 instruction to retrieve the associated category was given. This constitutes novel evidence that  
33 high-confident recognition memory is accompanied by incidental reinstatement of associated  
34 category information in MTL subregions, and supports a functional model of the MTL that  
35 emphasises content-sensitive representations during both encoding and retrieval.

## 36 1. Introduction

37 Recognition memory – the ability to distinguish previously encountered from novel  
38 items – critically depends on the medial temporal lobe (MTL), including the hippocampus (HC),  
39 perirhinal (PRC), parahippocampal (PHC), and entorhinal cortex (EC) (Eichenbaum et al.,  
40 2007). The individual functions that these subregions serve in recognition memory remain a  
41 subject of some debate (Wixted and Squire, 2011; Bird, 2017). One model that aims to account  
42 both for behavioural observations and their underlying neural substrate is the dual-process  
43 signal detection model (DPSD): In this view, two complementary processes contribute to  
44 recognition: Familiarity is a signal detection process resulting in graded recognition confidence,  
45 supported by PRC, whereas recollection is a threshold process resulting in high recognition  
46 confidence, and involves retrieval of associated information from the encoding context,  
47 supported by HC and PHC (Eichenbaum et al., 2007; Yonelinas et al., 2010).

48 Recent work has integrated such process-based views with more content-based  
49 accounts of MTL functioning (Davachi, 2006; Eichenbaum et al., 2007). The latter are based  
50 on connectivity studies in non-human primates and rodents (Suzuki and Amaral, 1994a,  
51 1994b; Burwell and Amaral, 1998a; Lavenex and Amaral, 2000). Here, the PRC, anatomically  
52 connected to the ventral visual stream, processes items, e.g. objects or faces, thereby  
53 contributing to familiarity. Meanwhile, the PHC, anatomically connected to the dorsal visual  
54 stream, processes spatial context memory, thereby providing the context information  
55 underlying recollection. The HC, exchanging information with both streams via anterolateral  
56 and posteriomedial subregions of the EC (alEC, pmEC) (Schultz et al., 2015), supports  
57 recollection in a content-agnostic manner (Davachi, 2006; Eichenbaum et al., 2007). MTL  
58 connectivity in humans is comparable to animals (Zeineh et al., 2012; Maass et al., 2015;  
59 Navarro Schröder et al., 2015). Indeed, a number of human functional magnetic resonance  
60 imaging (fMRI) studies have demonstrated sensitivity of the PRC to objects, or faces, and of  
61 the PHC to spatial or scene information during both perception/encoding (Awipi and Davachi,  
62 2008; Litman et al., 2009; Staresina et al., 2011; Schultz et al., 2021) and associative retrieval

63 (Schultz et al., 2012, 2019; Staresina et al., 2012, 2013; Mack and Preston, 2016) (for an  
64 overview, see Robin et al., 2019). Similar content-based dissociations have been  
65 demonstrated between aIEC and pmEC for faces/objects and scenes/spatial information,  
66 respectively (Schultz et al., 2012, 2015; Reagh and Yassa, 2014; Navarro Schröder et al.,  
67 2015; Berron et al., 2018).

68 Importantly, content-specific neural representations during retrieval overlap with  
69 representations during the original encoding episode (Danker and Anderson, 2010) (but see  
70 Favila et al., 2020). This so-called neural reinstatement of the encoding context is thought to  
71 underlie the subjective impression of re-experiencing an episode that accompanies  
72 recollection, but not familiarity (Eichenbaum et al., 2007; Danker and Anderson, 2010). Indeed,  
73 the degree of reinstatement is associated with objective accuracy (Gordon et al., 2014; Liang  
74 and Preston, 2017) as well as subjective vividness of the retrieved memory (Kuhl and Chun,  
75 2014; St-Laurent et al., 2015; Bone et al., 2020), and interrupting early reinstatement through  
76 transcranial magnetic stimulation decreases memory performance (Waldhauser et al., 2016).

77 Content-specificity during memory retrieval has largely been investigated using  
78 paradigms that emphasise intentional associative retrieval (Schultz et al., 2012, 2019;  
79 Staresina et al., 2012, 2013; Mack and Preston, 2016), e.g. by presenting a cue that was  
80 previously paired with an object or scene, and asking participants to retrieve the object or  
81 scene from memory (Schultz et al., 2019). Such intentional cued retrieval paradigms are not  
82 necessarily comparable to recognition memory. In a recognition paradigm, the task is to judge  
83 whether a given item has been previously encountered, and participants are typically asked to  
84 qualify their old/new judgments e.g. by rating their confidence (Yonelinas et al., 2010).  
85 Importantly, these confidence ratings refer to recognition confidence for the item itself, rather  
86 than any associated information that was present during encoding. Since recollection is a  
87 threshold-process assumed to selectively lead to high-confidence recognition (Yonelinas et al.,  
88 2010), the contributions of recollection and familiarity can be estimated from the asymmetry of  
89 the resulting receiver-operating characteristic (ROC) curve (Dunn, 2010; Yonelinas et al.,  
90 2010). Recollection is furthermore assumed to involve retrieval of the encoding context,

91 accompanied by neural reinstatement of associated memory content (Eichenbaum et al., 2007;  
92 Yonelinas et al., 2010). It follows that items that are recognised with high confidence ought to  
93 be accompanied by neural reinstatement of the encoding context, even in the absence of an  
94 explicit instruction to retrieve associated information. However, we are not aware of any studies  
95 investigating this proposition in subregions of the MTL.

96 Here, we test this open question, using distinct categories (faces, scenes) to track  
97 content representations in the MTL during perception and recognition. On the first day of the  
98 study, twenty-eight participants underwent fMRI while viewing a total of 120 faces and scenes  
99 (ten exemplars per category, six presentations per exemplar). The participants' task was to  
100 respond to flickers in the image presentation as quickly as possible to win a small reward  
101 (scanned perception phase<sup>1</sup>). Next, they learned a list of 260 words, each presented once  
102 while paired with one of the faces or scenes, with the task of combining each pair into a single  
103 mental image (unscanned encoding phase). The next day, participants returned for a  
104 recognition task of the words only, including all 260 target words from the previous day as well  
105 as 130 distractor words (scanned recognition phase). For each word, participants rated their  
106 confidence that it was old or new. Importantly, there was no instruction to retrieve the  
107 associated face or scene. Finally, they solved a source memory task, in which they responded  
108 for each word whether it had been paired with a face or a scene the day before (unscanned  
109 source phase). For the behavioural analysis, we summarised memory performance for words  
110 previously associated with either face or scenes using both model-based (recollection,  
111 familiarity) and model-free (corrected recognition, source accuracy) measures. For the fMRI

---

<sup>1</sup> Note that this experiment was originally devised to additionally assess the influence of associated reward on cortical reinstatement. Hence, the perception phase was designed as a reward task. As reward did not have reliable effects on behavioural or neural measures of memory, we here reanalyse the dataset omitting this factor. The brain responses extracted from this phase were modelled at a timepoint in each trial in which no reward information was available.

112 analysis, we tested for i) category sensitivity during face/scene perception, and ii) category  
113 reinstatement of the associated faces/scenes during word recognition within participant-  
114 specific MTL subregions of interest (ROIs). To this end, we utilised a set of complementary  
115 analyses. For the perception phase, we tested for differences in the mean univariate response  
116 of each ROI to face and scene perception, and furthermore established multivariate  
117 discriminability of faces vs. scenes by training and testing a face/scene classifier on the  
118 perception data in a leave-one-run-out fashion. For the recognition phase, we again  
119 characterised each region's univariate response profile to words previously associated with  
120 faces or scenes that were recognised with high or low confidence. Critically, we tested for  
121 neural reinstatement during word recognition by training a multivariate face/scene classifier on  
122 the perception phase, and testing it on words that were previously associated with faces or  
123 scenes and recognised with high confidence during the recognition phase. As there was no  
124 perceptual overlap between the phases, the classifier performance can only be driven by  
125 reinstatement of the face/scene encoding context. As recollection is thought to involve the  
126 reactivation of context information and lead to high-confident recognition judgments  
127 (Eichenbaum et al., 2007; Yonelinas et al., 2010), we expected words that were recognised  
128 with high confidence to be accompanied by neural reinstatement of the encoding category.

## 129 2. Results

### 130 2.1 Behavioural results

131 Overall, analyses of the behavioural data confirmed i) above chance performance in  
132 both the recognition and source phases, and ii) critically, no significant differences between  
133 words previously associated with faces (wordsF) and scenes (wordsS) (see Figure 1 for  
134 overview of the analysed measures).

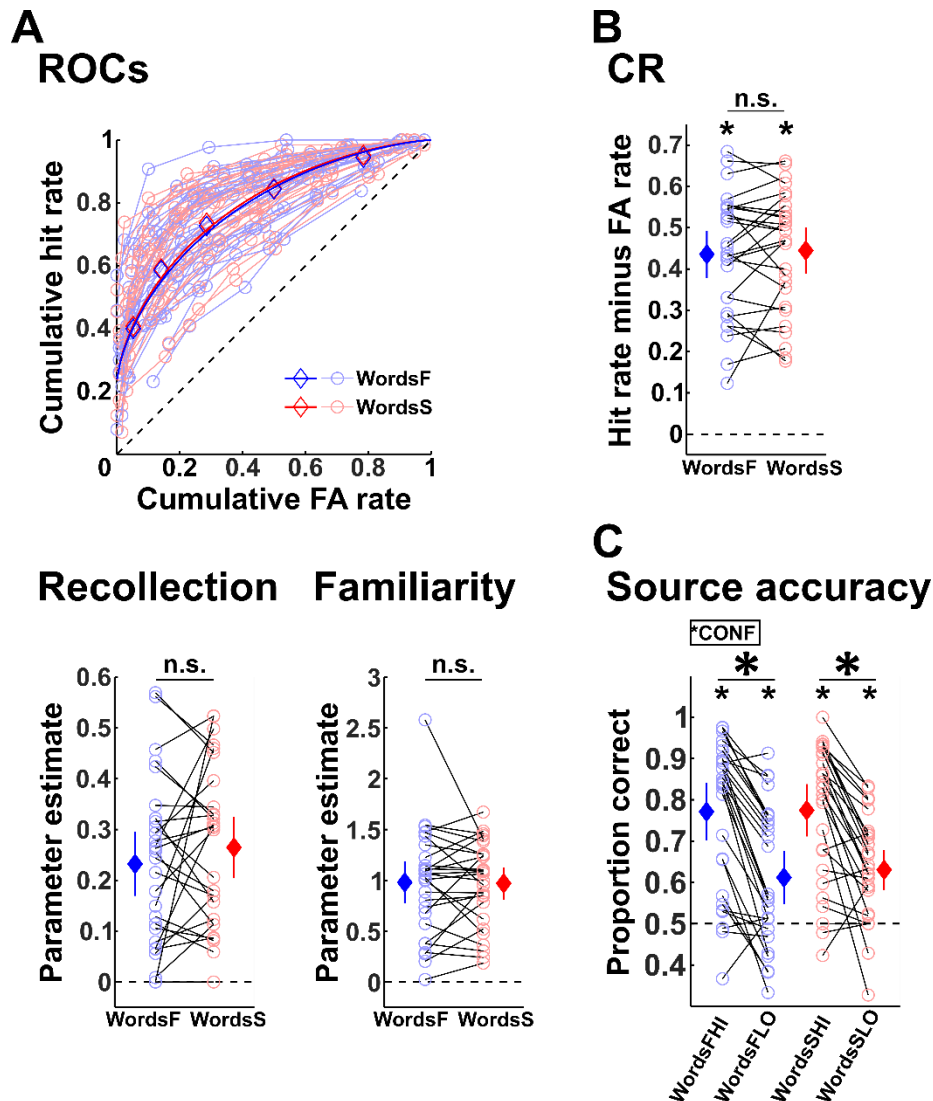

135

136 **Figure 1.** Behavioural results. Across memory measures, words previously associated with faces  
 137 (wordsF) and scenes (wordsS) showed similar performance. **A.** Receiver operating characteristic (ROC)  
 138 curves and behavioural modelling. The ROC plot (upper panel) depicts hit rates plotted against false  
 139 alarm (FA) rates, cumulative over confidence levels. Note that all participants are above the chance  
 140 diagonal. The fitted curves depict the DPSD predictions for wordsF and wordsS, here fitted to the group  
 141 averages for illustrative purposes. The lower panel plots the single subject parameter estimates of the  
 142 DPSD for recollection and familiarity. **B.** Corrected recognition (CR). **C.** Source accuracy. **Annotation:**  
 143 Circles and line plots denote single participants; diamonds denote means across participants; error bars  
 144 denote 95% confidence interval; dashed lines denote chance level. \*CONF: significant main effect of  
 145 recognition confidence. F: previous face association, S: previous scene association, HI: correctly  
 146 recognised with high confidence, LO: correctly recognised with low confidence. \* $p < .05$ . n.s.: not  
 147 significant.

148 First, we analysed participants' recognition memory. During the scanned recognition  
149 phase, participants rated their recognition confidence for a given word on a scale of 1 ("sure  
150 new") to 6 ("sure old"). From the distributions of hits and false alarms at each confidence level,  
151 we obtained receiver operating characteristic (ROC) curves, and estimated model parameters  
152 for recollection and familiarity (see Figure 1A). As this procedure assumes a lower bound of 0  
153 for both parameters, we did not test them against zero (note that all single-subject ROC curves  
154 are above the chance diagonal). Recollection did not differ significantly between wordsF and  
155 wordsS ( $t_{27}=1.124$ ,  $p=.271$ ), and neither did familiarity ( $t_{27}=0.145$ ,  $p=.885$ ). Additionally, as a  
156 model-free measure of recognition performance, we computed corrected recognition (CR, hit  
157 rates minus false alarm rates, see Figure 1B). CR exceeded chance for both wordsF  
158 ( $t_{27}=15.553$ ,  $p<.001$ ) and wordsS ( $t_{27}=16.300$ ,  $p<.001$ ), and did not differ significantly between  
159 wordsF and wordsS ( $t_{27}=0.578$ ,  $p=.568$ ).

160 In the post-scan source phase, for each word, participants gave a forced-choice  
161 response whether that word had been paired with a face or a scene the day before. Here, we  
162 analysed source accuracy for words that had been recognised with either high (HI) or low (LO)  
163 confidence during the recognition phase (i.e. HI: confidence rating = 6, LO: confidence rating  
164 = 4-5): wordsFHI, wordsFLO, wordsSHI, wordsSLO (see Figure 1C). A repeated measures  
165 ANOVA with the factors category and confidence revealed a highly significant main effect of  
166 confidence ( $F_{(1,27)}=88.083$ ,  $p<.001$ ; no other effects,  $p\geq.694$ ) such that high-confident hits  
167 yielded higher subsequent source accuracy than low-confident hits. This confidence effect was  
168 confirmed using paired t-tests, with source accuracy greater for wordsFHI vs. wordsFLO, and  
169 for wordsSHI vs. wordsSLO (both  $t_{27}\geq 5.652$ ,  $p<.001$ ). Finally, source accuracy exceeded  
170 chance for wordsFHI, wordsFLO, wordsSHI, and wordsSLO (all  $t_{27}\geq 3.578$ ,  $p\leq.001$ ).

## 171 **2.2 fMRI results: Strategy**

172 fMRI data were analysed within bilateral MTL subregion ROIs (HC, PRC, PHC, aIEC,  
173 pmEC) that were manually delineated on the single-subject T1 scans (Insausti et al., 1998;  
174 Pruessner et al., 2000, 2002; Maass et al., 2015). First, we sought to establish category



175 sensitivity during the perception phase, using both uni- and multivariate approaches. Then,  
176 only those ROIs showing such category sensitivity during perception, i.e. HC, PRC, and PHC  
177 (see Figure 2A), were considered for analyses of the recognition phase, as we were primarily  
178 interested in reinstatement of the perceptual activity. Here, we again employed both uni- and  
179 multivariate approaches.

### 180 **2.3 Category sensitivity during perception**

181 To establish category sensitivity during perception, we first analysed the MTL ROIs'  
182 univariate response profiles by averaging beta estimates for the face and scene regressors  
183 from the perception phase within each ROI. A two-way repeated-measures ANOVA with the  
184 factors ROI (HC, PHC, PRC, aIEC, pmEC) and category (faces, scenes) revealed a highly  
185 significant main effect of ROI ( $F_{(2.80,75.57)}=16.341$ ,  $p<.001$ ) and category ( $F_{(1,27)}=39.459$ ,  
186  $p<.001$ ), as well as an interaction effect ( $F_{(2.81,75.96)}=86.399$ ,  $p<.001$ ). Individual paired  $t$  tests  
187 within each ROI confirmed category sensitivity in PHC (scenes>faces,  $t_{27}=13.593$ ,  $p<.001$ ) and  
188 PRC (faces>scenes,  $t_{27}=3.400$ ,  $p=.002$ ), with a trend-level effect in HC (numerically  
189 scenes>faces,  $t_{27}=1.878$ ,  $p=.071$ ) (see Figure 2B). There was no such effect in aIEC or pmEC  
190 (both  $t_{27}\leq 0.826$ ,  $p\geq .416$ ). The PHC and PRC effects survived Holm-Bonferroni correction for  
191 multiple comparisons (5).

192 A multivariate decoding analysis complemented the univariate results. Multivariate  
193 analyses consider voxel patterns consisting of both activations and deactivations, thereby  
194 increasing sensitivity (Hebart and Baker, 2018). Face vs. scene classifiers were trained and  
195 tested on each ROI's perception data in a leave-one-run-out fashion. We tested the differences  
196 between average decision values for face and scene trials (category discriminability) against  
197 zero. Category discriminability was above chance in HC, PRC, and PHC (HC:  $t_{27}=3.379$ ,  
198  $p=.002$ , PRC:  $t_{27}=3.739$ ,  $p<.001$ , PHC:  $t_{27}=14.595$ ,  $p<.001$ , see Figure 2C), but not in aIEC or  
199 pmEC (both  $t_{27}\leq 0.389$ ,  $p\geq .700$ ). The effects in HC, PRC, and PHC survived Holm-Bonferroni  
200 correction for multiple comparisons (5).

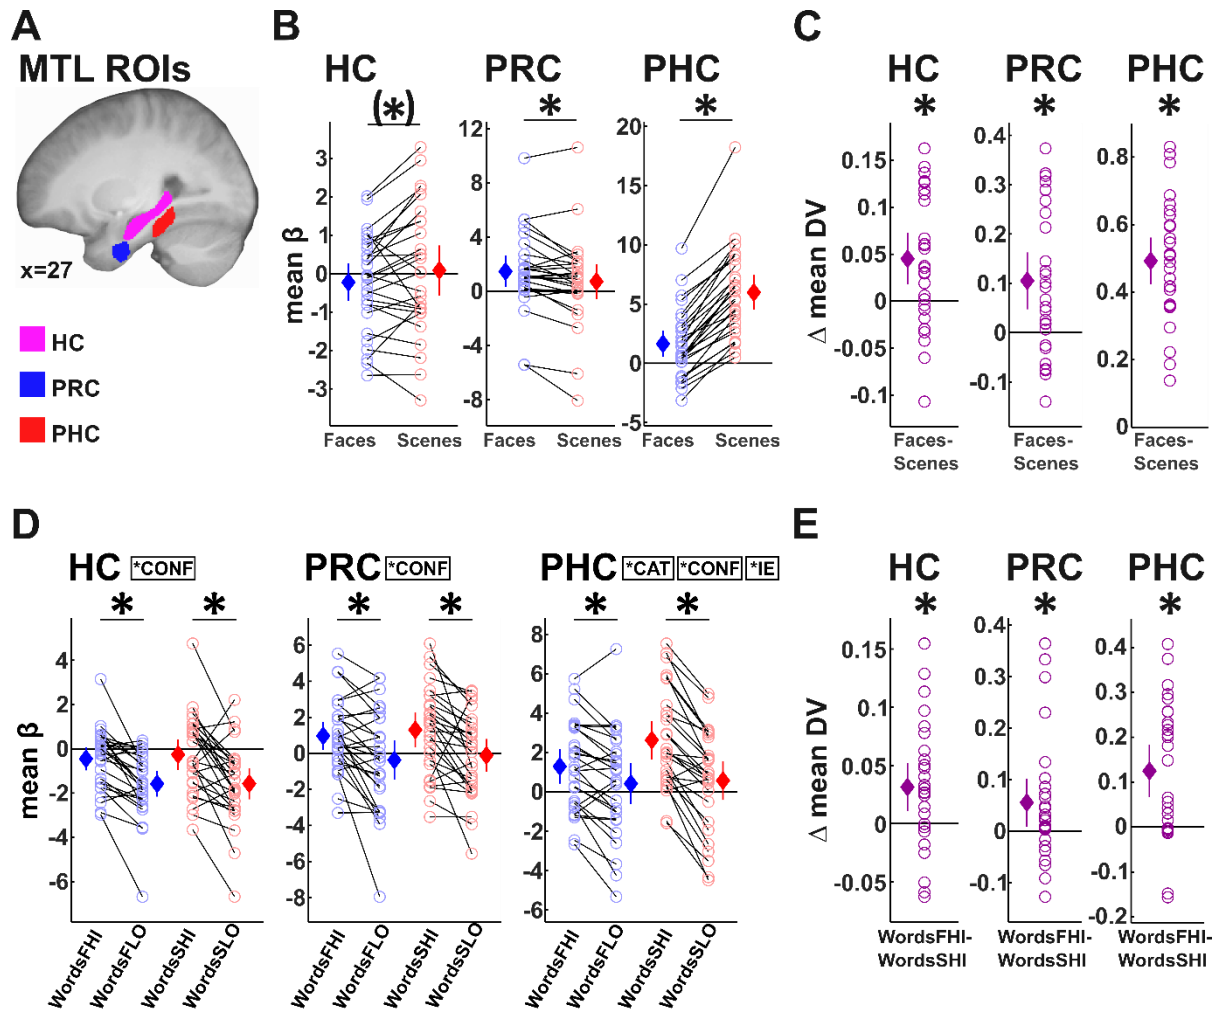

201

202

203

204

205

206

207

208

209

210

211

212

213

214

215

**Figure 2.** MTL subregions and fMRI results. **A.** For visualisation, single-participant ROIs of HC, PRC, and PHC were normalised, averaged across participants, thresholded at 0.5, and projected onto the mean normalised T1 image. **B.** Averaged beta values from the univariate analysis during face and scene perception. **C.** Differences between averaged decision values during face vs. scene perception from the multivariate decoding analysis. Positive difference values indicate discriminability of faces and scenes. **D.** Averaged beta values from the univariate analysis during high- vs. low confident correct recognition of words previously associated with faces vs. scenes. **E.** Results from the multivariate decoding analysis, with a classifier trained on face vs. scene perception, and tested on highly confidently recognised words previously associated with faces and scenes. Plotted are the differences between average decision values for wordsFHI and wordsSHI. Positive difference values indicate discriminability of wordsFHI and wordsSHI. **Annotation:** Circles and line plots denote single participants; diamonds denote means across participants, and error bars denote 95% confidence interval. \*CAT: significant main effect of category; \*CONF: significant main effect of recognition confidence; \*IE: significant interaction effect of category and recognition confidence. F: previous face association, S: previous scene association, HI:

216 correctly recognised with high confidence, LO: correctly recognised with low confidence. DV: decision  
217 value from the multivariate analysis. \* $p < .05$ , (\* $p < .1$ ).

218

## 219 **2.4 Category sensitivity during word recognition**

220 Having established category sensitivity during perception in HC, PRC, and PHC, we  
221 turned to testing the word recognition data from these ROIs for effects of prior association with  
222 faces vs. scenes. As recollection-related neural reinstatement is thought to be restricted to  
223 high-confidence recognition (Yonelinas et al., 2010), we analysed the univariate response  
224 profiles of the MTL ROIs separately for high vs. low confidence hits, and for words previously  
225 associated with faces vs. scenes (wordsFHI, wordsFLO, wordsSHI, wordsSLO, see Figure  
226 2D). A three-way repeated measures ANOVA with the factors ROI (HC, PRC, PHC),  
227 associated category (face, scene), and recognition confidence (high, low) revealed a  
228 significant three-way interaction of ROI, category, and confidence ( $F_{(1.39,37.59)}=3.998$ ,  $p=.040$ ).  
229 Most other effects were also (marginally) significant (ROI:  $F_{(1.74,46.92)}=13.684$ ,  $p<.001$ ; category:  
230  $F_{(1,27)}=6.501$ ,  $p=.017$ ; confidence:  $F_{(1,27)}=59.648$ ,  $p<.001$ ; ROI x category:  $F_{(1.66,44.93)}=5.240$ ,  
231  $p=.013$ ; category x confidence:  $F_{(1,27)}=4.165$ ,  $p=.051$ ; ROI x confidence:  $F_{(1.52,41.05)}=0.292$ ,  
232  $p=.688$ ). We followed up on the three-way interaction by computing separate two-way ANOVAs  
233 (category, confidence) within each ROI. All three ROIs showed highly significant main effects  
234 of confidence (all  $F_{(1,27)} \geq 20.205$ , all  $p < .001$ ). PHC additionally showed a main effect of category  
235 ( $F_{(1,27)}=11.468$ ,  $p=.002$ ) and, critically, an interaction of category and confidence, with a larger  
236 confidence effect for words previously associated with scenes than with faces ( $F_{(1,27)}=17.174$ ,  
237  $p < .001$ ). There was no such interaction in HC or PRC (all  $p \geq .525$ ). Follow-up paired  $t$ -tests  
238 between wordsFHI vs. wordsFLO, and wordsSHI vs. wordsSLO were significant in all ROIs (all  
239  $t_{27} \geq 3.587$ , all  $p \leq .0013$ ), and all tests survived Holm-Bonferroni correction for multiple  
240 comparisons (6). In sum, all ROIs showed highly significant univariate activity increases during  
241 high-confident compared to low-confident correct word recognition, with the PHC particularly  
242 engaged during high-confident recognition of words previously associated with scenes.

243 Finally, we turned to our central analysis of multivariate decoding of the recognition  
244 data. The above univariate analysis is limited in that it focuses on overall activity differences  
245 between conditions, averaged across each ROI's voxels. Multivariate analyses, in contrast,  
246 consider the information that is contained in each ROI's activation pattern (Hebart and Baker,  
247 2018). Here, because recollection is thought to involve reinstatement of associated information  
248 from the encoding context and lead to high confident hits (Eichenbaum et al., 2007; Yonelinas  
249 et al., 2010), we assume that neural activity during high-confident word recognition contains  
250 information about the previous face or scene association, reinstating patterns that were  
251 present during perception. Hence, a classifier trained to distinguish between faces and scenes  
252 during the perception phase and tested on high-confident hits during the recognition phase  
253 ought to be able to distinguish between previous face and scene associations. Thus, for each  
254 ROI, we tested category discriminability for high confidence words (i.e. the differences between  
255 average decision values for wordsFHI and wordsSHI) against zero (see Figure 2E). Category  
256 discriminability was above chance in all three ROIs (HC:  $t_{27}=3.090$ ,  $p=.005$ , PRC:  $t_{27}=2.432$ ,  
257  $p=.022$ , PHC:  $t_{27}=4.361$ ,  $p<.001$ ), and all three ROI effects survived Holm-Bonferroni correction  
258 for multiple comparisons (3).

### 259 3. Discussion

260 In the present study, we investigated whether high confident recognition of words is  
261 accompanied by incidental reinstatement of previously associated faces or scenes in  
262 subregions of the medial temporal lobe (MTL). During the recognition phase, participants rated  
263 their confidence that a given word was old or new, but, critically, were not asked to intentionally  
264 retrieve associated categorical information. Behaviourally, participants successfully  
265 recognised words from the encoding phase, and their subsequent source memory for  
266 associated categorical information was above chance. Analysis of the fMRI data first confirmed  
267 category sensitivity during perception in the MTL. Second, importantly, our data revealed  
268 incidental category reinstatement in MTL subregions during word recognition: Hippocampus  
269 (HC), perirhinal cortex (PRC), and parahippocampal cortex (PHC) demonstrated multivariate

270 discriminability of previous faces vs. scene associations, using a classifier trained on the  
271 perception data. Crucially, the perception and recognition phases did not share any perceptual  
272 input, as the perception phase presented faces and scenes, but not words, and the recognition  
273 phase presented words, but not faces or scenes. Hence, these multivariate results can only  
274 reflect reinstatement of associated face and scene information during word recognition. In  
275 addition, the univariate activity profiles of the MTL ROIs during the recognition phase showed  
276 robust activity increases for high compared to low confident words.

277         The present study provides novel evidence for incidental reinstatement of faces and  
278 scenes in the MTL in a word recognition task. This is in line with the dual process signal  
279 detection model (DPSD) of recognition memory, which assumes that some of the queried  
280 words – namely, those that are recollected – are accompanied by neural reinstatement of the  
281 associated information (Eichenbaum et al., 2007; Yonelinas et al., 2010). Indeed, our data  
282 demonstrate that words recognised with high confidence show such reinstatement in the MTL  
283 by allowing for multivariate decoding of the previously associated category. This observed  
284 category sensitivity within the MTL follows from its anatomical connectivity patterns. To  
285 simplify, the PRC vs. PHC serve as relay stations for object-related vs. spatial information,  
286 respectively, between the visual system and the HC (Davachi, 2006; Eichenbaum et al., 2007).  
287 This account is exemplified in our univariate perception results, with enhanced activity during  
288 face perception in the PRC, and enhanced activity during scene perception in the PHC. A  
289 number of previous fMRI studies have demonstrated such category dissociations between  
290 PRC and PHC during perception and encoding of faces (or objects) vs. spatial stimuli (or  
291 scenes) (Awipi and Davachi, 2008; Litman et al., 2009; Staresina et al., 2011; Liang et al.,  
292 2013; Berron et al., 2018; Schultz et al., 2019, 2021). Importantly, the bidirectionality of the  
293 underlying MTL connectivity might support the reinstatement of representations during  
294 memory retrieval (Davachi, 2006; Eichenbaum et al., 2007). Indeed, MTL content sensitivity in  
295 the absence of perceptual input, implying cortical reinstatement, has been demonstrated  
296 previously (Schultz et al., 2012, 2019; Staresina et al., 2013; Mack and Preston, 2016; Liang  
297 and Preston, 2017). Note that these studies investigated intentional retrieval – e.g. Schultz et

298 al. (2019) presented words and asked participants to vividly retrieve a previously associated  
299 object vs scene, which was associated with i) elevated category-sensitive univariate retrieval  
300 activity in PRC vs. PHC, and ii) increased across-voxel correlation of category-sensitive  
301 retrieval and perceptual activity.

302 In contrast, and complementing these earlier results, we investigated reinstatement  
303 during recognition. Participants rated their recognition confidence for a given target or  
304 distractor word, but were not instructed to retrieve the associated category information. To our  
305 knowledge, no previous study has investigated cortical reinstatement in MTL subregions in a  
306 recognition memory paradigm without explicit instruction to retrieve associated information.  
307 Two studies (Skinner et al., 2014; Bowen and Kensinger, 2017) had participants give  
308 recognition judgments for words previously paired with faces and scenes without explicit  
309 instruction to retrieve the associated information; however these studies did not focus on  
310 subregions of the MTL. Another study (Kuhl et al., 2013) also presented words that had been  
311 previously learned with faces and scenes. However, this was not a word recognition task:  
312 Participants were asked to explicitly retrieve information about the associated images, either  
313 the category of the image (face or scene), or its location (left or right). Here, MTL retrieval  
314 representations tracked category regardless of whether participants were focussing on the  
315 category or location of the image they were retrieving (however, their ROIs did not distinguish  
316 between PRC, PHC, and EC). Note that the absence of an explicit instruction to retrieve  
317 associated information in our study does not imply that recollection of these associations was  
318 non-conscious, or that the participants actively suppressed these associations. Furthermore,  
319 the subsequent behavioural test of source memory indicates that they had retained above-  
320 chance explicit memory for the associated category information. Our results demonstrate that  
321 cortical reinstatement in the MTL does not require an instruction of intentional, vivid retrieval.

322 Whereas our multivariate results give clear evidence for category reinstatement in the  
323 MTL, the univariate data are dominated by category-insensitive confidence effects across MTL  
324 subregions. Only in PHC were these effects increased for one category (scenes). The uni- and  
325 multivariate approaches differ on a number of dimensions. First, multivariate analyses are



326 generally thought of as more sensitive than univariate analyses (Hebart and Baker, 2018),  
327 which may explain why the multivariate analysis yielded evidence for category reinstatement  
328 in PRC while the univariate analysis did not. Moreover, while univariate analyses assume that  
329 a ROI's involvement in a process will be reflected in elevated mean activity, multivariate  
330 analyses assume that both activations and deactivations equally contribute to the information  
331 represented in a given ROI (Hebart and Baker, 2018). Here, some caution is warranted  
332 regarding the interpretation of our multivariate results: Given the univariate activity differences  
333 during the perception phase, a parsimonious explanation would be that, during recognition,  
334 PRC represents the retrieved face information, while PHC (and HC) represent the retrieved  
335 scene information. This would be in line with earlier functional reports (Schultz et al., 2012,  
336 2019; Staresina et al., 2013; Mack and Preston, 2016) as well as the PRC's and PHC's  
337 anatomical connectivity to regions of the ventral and dorsal visual stream, respectively (Suzuki  
338 and Amaral, 1994a; Eichenbaum et al., 2007). However, in our multivariate analyses, evidence  
339 for faces cannot be distinguished from evidence against scenes, and vice versa. This means  
340 that each ROI's ability to discriminate between face and scene associations may be driven by  
341 that ROI representing face information, or scene information, or both. Hence, our results imply  
342 that PRC, PHC, and HC maintain information about previous associations of the words during  
343 the recognition phase, but based on the multivariate results alone, we cannot conclude a  
344 preference of one category over the other. Indeed, as scenes typically contain objects, to which  
345 PRC is sensitive (Robin et al., 2019), it is likely that scene reinstatement also engages PRC to  
346 some degree. Finally, as the multivariate analysis classifies recognition trials based on neural  
347 patterns from the perception data, it is a direct test of the reinstatement concept, which implies  
348 topographical and informational overlap between perception/encoding and retrieval (Danker  
349 and Anderson, 2010). Recent approaches, however, have also investigated differences  
350 between encoding- and retrieval-related memory representations, emphasising shifts in  
351 representational granularity and brain topography (Baldassano et al., 2016; Bainbridge et al.,  
352 2020), direction of the information flow (Staresina et al., 2013; Linde-Domingo et al., 2019),  
353 and transformation of the memory trace itself (Xiao et al., 2017; Favila et al., 2018).

354 Reinstatement, as investigated here, is therefore only one facet of how the brain represents  
355 the content of memory during retrieval.

356 In the univariate data, we observed category-sensitive effects of recognition confidence  
357 in PHC, but, unexpectedly, not PRC. This is in contrast to earlier studies showing category-  
358 sensitive univariate effects in PRC and PHC during intentional, vivid retrieval (Schultz et al.,  
359 2012, 2019; Staresina et al., 2013). Given that all our behavioural measures indicate  
360 comparable memory performance for words previously associated with faces and scenes, this  
361 effect cannot be attributed to memory performance differences across conditions. However,  
362 recent results suggest that scenes could be special memoranda compared to e.g. faces or  
363 objects, increasing associative memory by providing a spatial context that binds to items more  
364 easily than other material (Robin and Olsen, 2019). Furthermore, although eliciting comparable  
365 memory performance, the scenes in our stimulus set had more diverse content (e.g. a  
366 mountain side, a coast, a forest) than the face stimuli. These properties could have increased  
367 scene reinstatement during the word recognition task. It is important to point out that PRC does  
368 not only receive information from the ventral visual stream, but additionally receives a number  
369 of inputs from spatial processing regions such as the PHC (Suzuki and Amaral, 1994a; Burwell  
370 and Amaral, 1998b). Accordingly, studies have reported evidence for similar processing of  
371 object-related and spatial information in the PRC under some circumstances (Berron et al.,  
372 2018; Lawrence et al., 2020).

373 Our results show category discriminability in the HC for both the perception and  
374 recognition phases, as well as (marginally) elevated mean activity during viewing of scenes  
375 compared to faces. Some previous studies, including both functional imaging and lesion  
376 studies, imply scene specialisation in the HC (Lee et al., 2005a, 2005b; Graham et al., 2006;  
377 Taylor et al., 2007; Zeidman et al., 2015), in line with a prominent role of the HC in spatial  
378 processing (Maguire and Mullally, 2013; Maguire et al., 2016; Bellmund et al., 2018). Other  
379 studies, however, have shown no evidence for category-level distinctions in the HC (Staresina  
380 et al., 2012, 2013; Mack and Preston, 2016; Schultz et al., 2019). Anatomy-based models of  
381 MTL function imply a primarily associative or relational role of the HC in episodic memory; in



382 this view, the HC is insensitive to stimulus category (Davachi, 2006; Eichenbaum et al., 2007).  
383 However, commonalities between relational, or associative, and spatial hippocampal  
384 processing have been noted (Buzsáki and Moser, 2013; Eichenbaum, 2017). Future work may  
385 illuminate the circumstances under which HC scene preferences prevail.

386 We note some limitations of the current study. First, recent years have seen rising  
387 interest in the role of anterolateral and posteromedial EC subregions (alEC, pmEC) during  
388 perception/encoding and retrieval, establishing the notion of category sensitivity in EC  
389 subregions during these processes (Schultz et al., 2012, 2015; Reagh and Yassa, 2014;  
390 Maass et al., 2015; Navarro Schröder et al., 2015; Berron et al., 2018). Here, we found no  
391 evidence for category-sensitive representations in the EC. One methodological challenge in  
392 fMRI of the MTL is the signal quality gradient from anterior to posterior MTL, leading to  
393 decreased signal-to-noise ratio and increased susceptibility artifacts in the anterior MTL cortex,  
394 including the EC (Carr et al., 2010). Hence, our null-results in the EC may be due to signal  
395 quality issues. A second potential limitation concerns the recollection vs. familiarity distinction.  
396 According to the DPSD, high-confident hits may consist of both recollected and highly familiar  
397 items (Yonelinas et al., 2010). While we assume that, based on the underlying model, the  
398 observed sensitivity to the associated category during recognition memory was driven by the  
399 recollected items rather than the highly familiar items (Eichenbaum et al., 2007; Yonelinas et  
400 al., 2010), these processes cannot be disentangled on the item level. Hence, we cannot rule  
401 out incidental reinstatement for highly familiar items. Lastly, there has been a discussion  
402 whether the MTL is involved in perception at all, or whether all MTL processing is necessarily  
403 mnemonic (Suzuki and Baxter, 2009). Our results do not resolve this debate. While we have  
404 treated the category-specific MTL processes during the perception phase as perceptual in  
405 nature, we cannot rule out that they have a primarily mnemonic function, i.e. memory encoding  
406 (Awipi and Davachi, 2008; Staresina et al., 2011).

407 In summary, we show that, in the absence of any differences in perceptual input, the  
408 three major subregions of the MTL – HC, PRC, and PHC – nonetheless contain  
409 representations of associated category information (faces/scenes) during word recognition.

410 These data support a functional model of episodic memory in the MTL that is informed by  
411 anatomical connectivity, and that emphasises the similarity of content representations during  
412 perception/encoding and retrieval. Future work may clarify the role of human entorhinal  
413 subregions during long-term retrieval of category-sensitive representations, as well as  
414 differences in representations involved during perception/encoding vs. retrieval.

## 415 **4. Materials and Methods**

### 416 **4.1 Sample**

417 We report data from 28 volunteers (8 male, mean age 26.0, range 18-35). Three more  
418 were excluded from data analysis (one for excessive head movement, one for falling asleep in  
419 the scanner; one dropped out after day one). All volunteers were right-handed, healthy with  
420 normal or corrected-to-normal vision, and reported no past neurological or psychiatric  
421 diagnoses. They received monetary reimbursement of €10/hour + bonus. Prior to participation,  
422 they gave written informed consent. The study procedure was approved by the local ethics  
423 committee (Hamburg Board of Physicians).

### 424 **4.2 General procedure**

425 The experiment was conducted over two consecutive days. Day one comprised the  
426 scanned perception (~30min) and unscanned encoding phase (~40min). Day two comprised  
427 the scanned recognition (~59min), and unscanned source phase (~25-40min). Mean lag  
428 between perception and recognition phase was 19.5h (range: 13.5-24h).

### 429 **4.3 Stimuli**

430 Stimuli consisted of 10 grayscale neutral faces (Endl et al., 1998) and 10 grayscale  
431 natural outdoor scenes (various internet sources) used in a previous study (Schultz et al.,  
432 2012), as well as 390 emotionally neutral, concrete German nouns from the Berlin Affective  
433 Word List Reloaded (Vö et al., 2009). For each participant, 260 words were randomly selected  
434 as encoding items, whereas the remaining 130 served as distractors during the recognition  
435 phase.

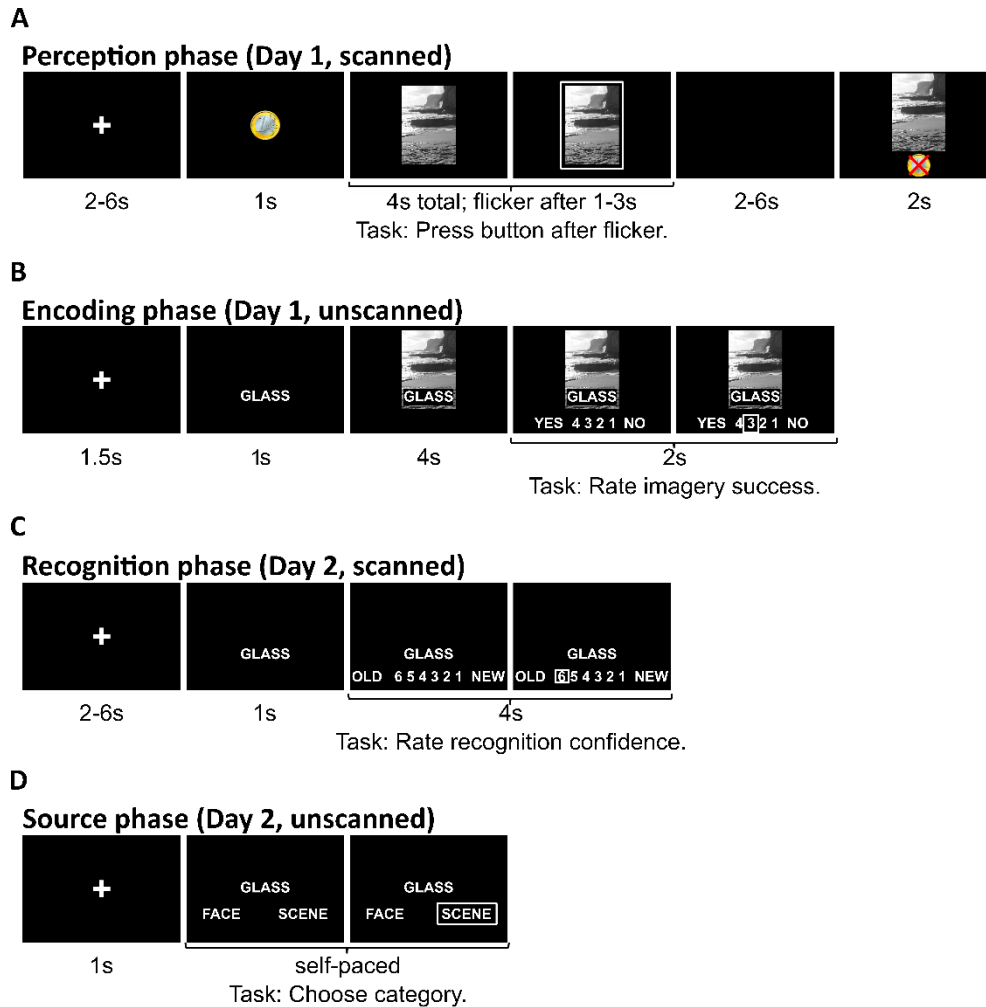

436

437 **Figure 4.** Example trials for the experimental phases. A: Perception phase. B: Encoding phase. C:

438 Recognition phase. D: Source phase.

439

#### 440 **4.4 Behavioural tasks**

441 The *perception phase* was a modified Monetary Incentive Delay (MID) task (Knutson

442 et al., 2000) (see Figure 4A for details). Each of the 20 faces and scenes appeared 6 times,

443 resulting in 120 trials over 3 runs. Trial order was pseudo-randomised, with no more than 4

444 face or scene trials appearing in a row. Trials started with a 1€ coin followed immediately by a

445 face or scene (initial image presentation). At a random timepoint during image presentation, a

446 flicker (blank screen for 1 frame) prompted participants to press a button as fast as possible to

447 win a reward, using a button box held in their right hand. Finally, the image reappeared with

448 reward feedback. Response time limits adapted to a reward probability of 0.735 over trials,

449 separately for faces and scenes. Participants received a bonus for each earned reward,  
450 amounting to ~€3.20 in total.

451 In the *encoding phase* (see Figure 4B for details), participants encoded associations  
452 between words and images. Each of the 20 faces and scenes was paired with 13 words,  
453 resulting in 260 trials, presented in 5 blocks with self-paced breaks. Trial order was  
454 pseudorandomised, with no more than 4 face or scene trials in a row, and identical images  
455 separated by at least 10 trials. Per trial, participants were asked to combine a word and image  
456 into a single mental image, and rated their imagery success on a scale of 1 to 4. Response  
457 layout (1-2-3-4 or 4-3-2-1) was randomly switched between trials.

458 In the *recognition phase* (see Figure 4C for details), all 260 encoded words plus 130  
459 distractor words were presented over 5 runs. Trial order was pseudorandomised so that no  
460 more than 4 distractors and 4 words associated with either a face or a scene appeared in a  
461 row. Per trial, participants were asked to rate their confidence that a given word was new or  
462 old, on a scale of 1 to 6. Participants used two button boxes held in their left and right hand,  
463 with three buttons mapped on each. Response layout (1-2-3-4-5-6 or 6-5-4-3-2-1) was  
464 randomly switched between trials. No instruction was given to retrieve the associated image.

465 In the *source phase* (see Figure 4D for details), all 390 words were presented again,  
466 and participants indicated whether a given word had been paired with a face or a scene the  
467 day before. Additionally, they indicated whether they associated the word with a reward or not  
468 (not pictured; data not included in the present report).

469 All tasks were programmed using Presentation® software (Version 14.9,  
470 Neurobehavioral Systems, Inc., Berkeley, CA, [www.neurobs.com](http://www.neurobs.com)).

#### 471 **4.5 Behavioural analyses**

472 For the recognition phase, we analysed a model-free outcome measure (corrected  
473 recognition, CR) as well as two model-based outcome measures (recollection, familiarity). CR  
474 was computed as the difference between hit rate minus false alarm rate (the proportions of

475 confidence ratings  $\geq 4$  for targets minus distractors, respectively). Recollection and familiarity  
476 are parameters in the dual-process model. This model assumes that two processes contribute  
477 to recognition memory: An all-or-none threshold process (recollection), and a signal detection  
478 process (familiarity) (Yonelinas et al., 2010). Parameter estimates for these processes were  
479 obtained from each participant's distribution of recognition confidence ratings, separately for  
480 wordsF and wordsS, using maximum likelihood estimation (Dunn, 2010). Finally, for the source  
481 phase, we computed source accuracy (proportion of correctly identified source category) for  
482 words that, during the recognition phase, had been correctly recognised with high confidence  
483 (confidence rating = 6) respectively low confidence (confidence rating = 4-5), separately for  
484 wordsF and wordsS.

#### 485 **4.6 MR data acquisition**

486 MR data was acquired on a 3T Siemens TIM TRIO scanner using a 32 channel head  
487 coil. The perception and recognition phases were scanned using a high-resolution T2\*-  
488 weighted EPI sequence (33 descending slices, no gap, 1.5mm isotropic voxels, TR=2.49s,  
489 TE=30ms, PAT factor 2) with the field of view aligned to the longitudinal MTL axis. On day 2,  
490 an additional T1-weighted MPRAGE structural scan was acquired (240 slices, 1x1x1mm).

#### 491 **4.7 ROI approach**

492 All statistical analyses were conducted in single-subject space within bilateral masks of  
493 MTL subregions (HC, PRC, PHC, aIEC, pmEC) that were manually segmented on the T1  
494 following existing guidelines (Insausti et al., 1998; Pruessner et al., 2000, 2002; Maass et al.,  
495 2015) using MRlcron (Rorden and Brett, 2000). For PRC and PHC, the middle third of the  
496 parahippocampal gyrus (i.e. posterior PRC and anterior PHC) was discarded to maximise  
497 category sensitivity within these regions (Staresina et al., 2013; Schultz et al., 2019).

#### 498 **4.8 MR data preprocessing**

499 MRI data were analysed in Matlab/SPM12 except where noted. Functional images  
500 were corrected for slice acquisition time, head movement, and movement-related distortions.

501 T1 images were coregistered to the functional data using boundary-based registration (FSL  
502 `epi_reg`). In order to create Figure 2A, T1 images were segmented into grey matter, white  
503 matter, and cerebrospinal fluid, and the resulting flowfields were used to normalise the T1  
504 images and single-subject ROIs into MNI (Montreal Neurological Institute) space.

#### 505 **4.9 Univariate analyses**

506 For the univariate analyses, we set up two categorical first-level linear models (GLMs)  
507 on the non-normalised, unsmoothed data from the perception and recognition phase,  
508 respectively. Runs were concatenated within each phase. Regressors were modelled as stick  
509 functions convolved with the canonical hemodynamic response function. For the perception  
510 phase, regressors of interest comprised faces vs. scenes during initial image onset, when no  
511 reward information was available. Also modelled were the reward feedback onsets, separately  
512 for face/reward, face/no reward, scene/reward, and scene/no reward. For the recognition  
513 phase, regressors were modelled on the word onset, and regressors of interest comprised  
514 words previously associated with faces (F) vs. scenes (S) and correctly recognised with high  
515 (HI, confidence rating = 6) vs. low confidence (LO, confidence rating = 4-5) (`wordsFHI`,  
516 `wordsFLO`, `wordsSHI`, `wordsSLO`). Also modelled were misses, separately for `wordsF` and  
517 `wordsS` (confidence ratings  $\leq 3$ ), false alarms and correct rejections for the distractor items,  
518 and error trials. Models included a high-pass filter (128s) and autoregressive model (AR(1)) as  
519 well as run constants. Beta values from the regressors of interest were averaged within each  
520 ROI and submitted to group-level analyses.

#### 521 **4.10 Multivariate analyses**

522 The first-level GLMs underlying the multivariate analyses were set up similarly to the  
523 univariate analyses, albeit with a single-trial regressor on each initial image onset as well as  
524 reward feedback onset (perception phase, the latter were discarded), and on each word onset  
525 (recognition phase). Multivariate decoding was applied to single-trial  $t$ -values from each ROI  
526 (z-scored within each voxel separately for training and test data), using regularised linear  
527 discriminant analysis (LDA) as implemented in the MVPA-light toolbox (Treder, 2020). Two

528 decoding analyses were conducted: First, we tested category discriminability during  
529 perception. Here, we trained and tested a classifier on face vs. scene perception in a leave-  
530 one-run-out fashion. Second, we tested category reinstatement during the recognition phase.  
531 Here, we trained a classifier on face vs. scene perception during the perception phase, and  
532 tested it on high-confident hits for words previously associated with faces vs. scenes (wordsFHI  
533 vs. wordsSHI) from the recognition phase. These analyses resulted in decision values for each  
534 testing trial and ROI, with increasing values indicating face evidence, and decreasing values  
535 indicating scene evidence. As the zero point in these analyses is arbitrary (representing the  
536 midpoint of all trials in the testing set), we computed group level analyses on the differences  
537 between decision values for face minus scene trials (perception phase) and wordsFHI minus  
538 wordsSHI (recognition phase), with positive difference values indicating face vs. scene  
539 discriminability.

## 540 5. Acknowledgments

541 We thank Matthias Treder for helpful discussions of the multivariate analysis approach.

## 542 6. References

- 543 Awipi T, Davachi L (2008) Content-specific source encoding in the human medial temporal lobe. *J Exp*  
544 *Psychol Learn Mem Cogn* 34:769–779.
- 545 Bainbridge WA, Hall EH, Baker CI (2020) Distinct Representational Structure and Localization for  
546 Visual Encoding and Recall during Visual Imagery. *Cereb Cortex*.
- 547 Baldassano C, Esteva A, Fei-Fei L, Beck DM (2016) Two Distinct Scene-Processing Networks  
548 Connecting Vision and Memory. *eNeuro* 3.
- 549 Bellmund JLS, Gärdenfors P, Moser EI, Doeller CF (2018) Navigating cognition: Spatial codes for  
550 human thinking. *Science* 362.
- 551 Berron D, Neumann K, Maass A, Schütze H, Fliessbach K, Kiven V, Jessen F, Sauvage M, Kumaran D,  
552 Düzel E (2018) Age-related functional changes in domain-specific medial temporal lobe  
553 pathways. *Neurobiol Aging* 65:86–97.
- 554 Bird CM (2017) The role of the hippocampus in recognition memory. *Cortex* 93:155–165.
- 555 Bone MB, Ahmad F, Buchsbaum BR (2020) Feature-specific neural reactivation during episodic  
556 memory. *Nat Commun* 11:1945.



- 557 Bowen HJ, Kensinger EA (2017) Recapitulation of emotional source context during memory retrieval.  
558 Cortex 91:142–156.
- 559 Burwell RD, Amaral DG (1998a) Cortical afferents of the perirhinal, postrhinal, and entorhinal cortices  
560 of the rat. J Comp Neurol 398:179–205.
- 561 Burwell RD, Amaral DG (1998b) Perirhinal and postrhinal cortices of the rat: interconnectivity and  
562 connections with the entorhinal cortex. J Comp Neurol 391:293–321.
- 563 Buzsáki G, Moser EI (2013) Memory, navigation and theta rhythm in the hippocampal-entorhinal  
564 system. Nat Neurosci 16:130–138.
- 565 Carr VA, Rissman J, Wagner AD (2010) Imaging the human medial temporal lobe with high-resolution  
566 fMRI. Neuron 65:298–308.
- 567 Danker JF, Anderson JR (2010) The ghosts of brain states past: remembering reactivates the brain  
568 regions engaged during encoding. Psychol Bull 136:87–102.
- 569 Davachi L (2006) Item, context and relational episodic encoding in humans. Curr Opin Neurobiol  
570 16:693–700.
- 571 Dunn JC (2010) How to fit models of recognition memory data using maximum likelihood. 1 3:140–  
572 149.
- 573 Eichenbaum H (2017) The role of the hippocampus in navigation is memory. J Neurophysiol  
574 117:1785–1796.
- 575 Eichenbaum H, Yonelinas AP, Ranganath C (2007) The medial temporal lobe and recognition memory.  
576 Annu Rev Neurosci 30:123–152.
- 577 Endl W, Walla P, Lindinger G, Lalouschek W, Barth FG, Deecke L, Lang W (1998) Early cortical  
578 activation indicates preparation for retrieval of memory for faces: an event-related potential  
579 study. Neurosci Lett 240:58–60.
- 580 Favila SE, Lee H, Kuhl BA (2020) Transforming the Concept of Memory Reactivation. Trends Neurosci  
581 43:939–950.
- 582 Favila SE, Samide R, Sweigart SC, Kuhl BA (2018) Parietal Representations of Stimulus Features Are  
583 Amplified during Memory Retrieval and Flexibly Aligned with Top-Down Goals. J Neurosci  
584 38:7809–7821.
- 585 Gordon AM, Rissman J, Kiani R, Wagner AD (2014) Cortical reinstatement mediates the relationship  
586 between content-specific encoding activity and subsequent recollection decisions. Cereb  
587 Cortex 24:3350–3364.
- 588 Graham KS, Scahill VL, Hornberger M, Barense MD, Lee ACH, Bussey TJ, Saksida LM (2006) Abnormal  
589 categorization and perceptual learning in patients with hippocampal damage. J Neurosci  
590 26:7547–7554.
- 591 Hebart MN, Baker CI (2018) Deconstructing multivariate decoding for the study of brain function.  
592 Neuroimage 180:4–18.



- 593 Insausti R, Juottonen K, Soininen H, Insausti AM, Partanen K, Vainio P, Laakso MP, Pitkänen A (1998)  
594 MR volumetric analysis of the human entorhinal, perirhinal, and temporopolar cortices. *AJNR*  
595 *Am J Neuroradiol* 19:659–671.
- 596 Knutson B, Westdorp A, Kaiser E, Hommer D (2000) FMRI visualization of brain activity during a  
597 monetary incentive delay task. *Neuroimage* 12:20–27.
- 598 Kuhl BA, Chun MM (2014) Successful remembering elicits event-specific activity patterns in lateral  
599 parietal cortex. *J Neurosci* 34:8051–8060.
- 600 Kuhl BA, Johnson MK, Chun MM (2013) Dissociable neural mechanisms for goal-directed versus  
601 incidental memory reactivation. *J Neurosci* 33:16099–16109.
- 602 Lavenex P, Amaral DG (2000) Hippocampal-neocortical interaction: a hierarchy of associativity.  
603 *Hippocampus* 10:420–430.
- 604 Lawrence AV, Cardoza J, Ryan L (2020) Medial temporal lobe regions mediate complex visual  
605 discriminations for both objects and scenes: A process-based view. *Hippocampus* 30:879–  
606 891.
- 607 Lee ACH, Buckley MJ, Pegman SJ, Spiers H, Scahill VL, Gaffan D, Bussey TJ, Davies RR, Kapur N,  
608 Hodges JR, Graham KS (2005a) Specialization in the medial temporal lobe for processing of  
609 objects and scenes. *Hippocampus* 15:782–797.
- 610 Lee ACH, Bussey TJ, Murray EA, Saksida LM, Epstein RA, Kapur N, Hodges JR, Graham KS (2005b)  
611 Perceptual deficits in amnesia: challenging the medial temporal lobe “mnemonic” view.  
612 *Neuropsychologia* 43:1–11.
- 613 Liang JC, Preston AR (2017) Medial temporal lobe reinstatement of content-specific details predicts  
614 source memory. *Cortex* 91:67–78.
- 615 Liang JC, Wagner AD, Preston AR (2013) Content representation in the human medial temporal lobe.  
616 *Cereb Cortex* 23:80–96.
- 617 Linde-Domingo J, Treder MS, Kerrén C, Wimber M (2019) Evidence that neural information flow is  
618 reversed between object perception and object reconstruction from memory. *Nat Commun*  
619 10:179.
- 620 Litman L, Awipi T, Davachi L (2009) Category-specificity in the human medial temporal lobe cortex.  
621 *Hippocampus* 19:308–319.
- 622 Maass A, Berron D, Libby LA, Ranganath C, Düzel E (2015) Functional subregions of the human  
623 entorhinal cortex. *Elife* 4.
- 624 Mack ML, Preston AR (2016) Decisions about the past are guided by reinstatement of specific  
625 memories in the hippocampus and perirhinal cortex. *Neuroimage* 127:144–157.
- 626 Maguire EA, Intraub H, Mullally SL (2016) Scenes, Spaces, and Memory Traces: What Does the  
627 Hippocampus Do? *Neuroscientist* 22:432–439.
- 628 Maguire EA, Mullally SL (2013) The hippocampus: a manifesto for change. *J Exp Psychol Gen*  
629 142:1180–1189.

- 630 Navarro Schröder T, Haak KV, Zaragoza Jimenez NI, Beckmann CF, Doeller CF (2015) Functional  
631 topography of the human entorhinal cortex. *Elife* 4.
- 632 Pruessner JC, Köhler S, Crane J, Pruessner M, Lord C, Byrne A, Kabani N, Collins DL, Evans AC (2002)  
633 Volumetry of temporopolar, perirhinal, entorhinal and parahippocampal cortex from high-  
634 resolution MR images: considering the variability of the collateral sulcus. *Cereb Cortex*  
635 12:1342–1353.
- 636 Pruessner JC, Li LM, Serles W, Pruessner M, Collins DL, Kabani N, Lupien S, Evans AC (2000)  
637 Volumetry of hippocampus and amygdala with high-resolution MRI and three-dimensional  
638 analysis software: minimizing the discrepancies between laboratories. *Cereb Cortex* 10:433–  
639 442.
- 640 Reagh ZM, Yassa MA (2014) Object and spatial mnemonic interference differentially engage lateral  
641 and medial entorhinal cortex in humans. *Proc Natl Acad Sci USA* 111:E4264-4273.
- 642 Robin J, Olsen RK (2019) Scenes facilitate associative memory and integration. *Learn Mem* 26:252–  
643 261.
- 644 Robin J, Rai Y, Valli M, Olsen RK (2019) Category specificity in the medial temporal lobe: A systematic  
645 review. *Hippocampus* 29:313–339.
- 646 Rorden C, Brett M (2000) Stereotaxic display of brain lesions. *Behav Neurol* 12:191–200.
- 647 Schultz H, Sommer T, Peters J (2012) Direct evidence for domain-sensitive functional subregions in  
648 human entorhinal cortex. *J Neurosci* 32:4716–4723.
- 649 Schultz H, Sommer T, Peters J (2015) The Role of the Human Entorhinal Cortex in a Representational  
650 Account of Memory. *Front Hum Neurosci* 9:628.
- 651 Schultz H, Tibon R, LaRocque KF, Gagnon SA, Wagner AD, Staresina BP (2019) Content tuning in the  
652 medial temporal lobe cortex: Voxels that perceive, retrieve. *eNeuro*.
- 653 Schultz H, Yoo J, Meshi D, Heekeren HR (2021) Category-specific item encoding in the medial  
654 temporal lobe and beyond: The role of reward. *bioRxiv:2021.01.22.427769*.
- 655 Skinner EI, Manios M, Fugelsang J, Fernandes MA (2014) Reinstatement of encoding context during  
656 recollection: behavioural and neuroimaging evidence of a double dissociation. *Behav Brain*  
657 *Res* 264:51–63.
- 658 Staresina BP, Cooper E, Henson RN (2013) Reversible information flow across the medial temporal  
659 lobe: the hippocampus links cortical modules during memory retrieval. *J Neurosci* 33:14184–  
660 14192.
- 661 Staresina BP, Duncan KD, Davachi L (2011) Perirhinal and parahippocampal cortices differentially  
662 contribute to later recollection of object- and scene-related event details. *J Neurosci*  
663 31:8739–8747.
- 664 Staresina BP, Henson RNA, Kriegeskorte N, Alink A (2012) Episodic reinstatement in the medial  
665 temporal lobe. *J Neurosci* 32:18150–18156.
- 666 St-Laurent M, Abdi H, Buchsbaum BR (2015) Distributed Patterns of Reactivation Predict Vividness of  
667 Recollection. *J Cogn Neurosci* 27:2000–2018.

- 668 Suzuki WA, Amaral DG (1994a) Perirhinal and parahippocampal cortices of the macaque monkey:  
669 cortical afferents. *J Comp Neurol* 350:497–533.
- 670 Suzuki WA, Amaral DG (1994b) Topographic organization of the reciprocal connections between the  
671 monkey entorhinal cortex and the perirhinal and parahippocampal cortices. *J Neurosci*  
672 14:1856–1877.
- 673 Suzuki WA, Baxter MG (2009) Memory, perception, and the medial temporal lobe: a synthesis of  
674 opinions. *Neuron* 61:678–679.
- 675 Taylor KJ, Henson RNA, Graham KS (2007) Recognition memory for faces and scenes in amnesia:  
676 dissociable roles of medial temporal lobe structures. *Neuropsychologia* 45:2428–2438.
- 677 Treder MS (2020) MVPA-Light: A Classification and Regression Toolbox for Multi-Dimensional Data.  
678 *Front Neurosci* 14 Available at:  
679 <https://www.frontiersin.org/articles/10.3389/fnins.2020.00289/full> [Accessed July 17, 2020].
- 680 Vö ML-H, Conrad M, Kuchinke L, Urton K, Hofmann MJ, Jacobs AM (2009) The Berlin Affective Word  
681 List Reloaded (BAWL-R). *Behav Res Methods* 41:534–538.
- 682 Waldhauser GT, Braun V, Hanslmayr S (2016) Episodic Memory Retrieval Functionally Relies on Very  
683 Rapid Reactivation of Sensory Information. *J Neurosci* 36:251–260.
- 684 Wixted JT, Squire LR (2011) The medial temporal lobe and the attributes of memory. *Trends Cogn Sci*  
685 15:210–217.
- 686 Xiao X, Dong Q, Gao J, Men W, Poldrack RA, Xue G (2017) Transformed Neural Pattern Reinstatement  
687 during Episodic Memory Retrieval. *J Neurosci* 37:2986–2998.
- 688 Yonelinas AP, Aly M, Wang W-C, Koen JD (2010) Recollection and familiarity: examining controversial  
689 assumptions and new directions. *Hippocampus* 20:1178–1194.
- 690 Zeidman P, Mullally SL, Maguire EA (2015) Constructing, Perceiving, and Maintaining Scenes:  
691 Hippocampal Activity and Connectivity. *Cereb Cortex* 25:3836–3855.
- 692 Zeineh MM, Holdsworth S, Skare S, Atlas SW, Bammer R (2012) Ultra-high resolution diffusion tensor  
693 imaging of the microscopic pathways of the medial temporal lobe. *Neuroimage* 62:2065–  
694 2082.
